# Supplementary material for: Broad regulation of gene isoform expression by Wnt signaling in cancer
Source: PubMed Central journal article supplement — RNA. 2019 Dec;25(12):1696–713. doi: 10.1261/rna.071506.119 (PMC6859862; doi:10.1261/rna.071506.119), 2019-12
Supplement: supp_071506.119_Supplemental_Figures.pdf [file supp_071506.119_Supplemental_Figures.pdf]

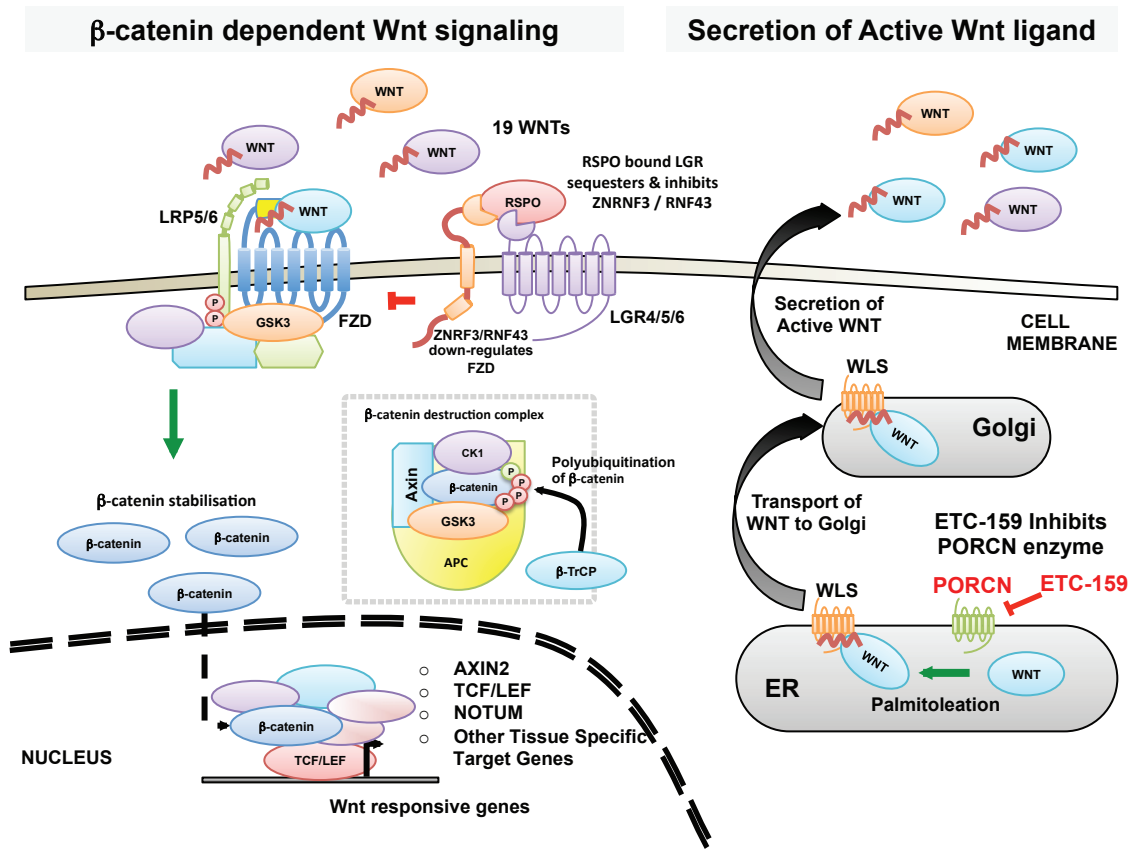

**Supplementary Figure S1:** Schematic illustration of the β-catenin dependent Wnt signaling pathway and the mechanism that governs Wnt ligand secretion. The binding of Wnt ligands to the FZD-LRP receptor disengages the β-catenin destruction complex leading to increased β-catenin protein abundance. β-catenin can translocate into the nucleus to bind to the TCF/LEF transcription factors and recruit other coactivators to induce the expression of Wnt responsive genes such as *AXIN2* and *NOTUM*. Note that the palmitoleation of the Wnt ligand by the PORCN enzyme (which is inhibited by the chemical ETC-159) is required for its binding to WLS (to facilitate the secretion of the Wnt ligand) and its interaction with the FZD receptor. The FZD receptor abundance is down-regulated by the membrane-bound E3 ubiquitin ligase, RNF43/ZNRNF3. RSO ligand binds to the LGR receptor to form a complex that sequesters the RNF43/ZNRNF3 enzyme and suppresses its activity.

## SUPPLEMENTARY FIGURE S2

| Human Gene                                | Forward Primer               | Reverse Primer                    |
|-------------------------------------------|------------------------------|-----------------------------------|
| <i>EPNI</i> (Reference)                   | CTCTGACTTTGACCGACTCC         | TGACCCCACTCATGTCAAAC              |
| <i>CTNNB1</i>                             | AGCTTCCAGACACGCTATCAT        | CGGTACAACGAGCTGTTTCTAC            |
| <i>AXIN2</i>                              | CTGGCTCCAGAAGATCACAAAG       | CATCCTCCCAGATCTCCTCAA             |
| <i>HNRNPA1</i>                            | TCAGAGTCTCCTAAAGAGCCC        | ACCTTGTGTGGCCTTGCAAT              |
| <i>HNRNPA2B1</i>                          | ATTGATGGGAGAGTAGTTGAGCC      | AATTCCGCCAACAAACAGCTT             |
| <i>HNRNPM</i>                             | GCGGCGACGGAGATCAAAA          | CTCATTCTGAGCAGGTCGTTC             |
| <i>NOTUM</i>                              | CTTCATGGCGCAAGTCAAGAG        | CGAGGTGTTGAGTAGGAGGTG             |
| <i>SRSF1</i>                              | CCGCAGGGAACAACGATTG          | GCCGTATTTGTAGAACACGTCCT           |
| <i>SRSF3</i>                              | TGGCAACAAGACGGAATTGGA        | CAAAGCCGGGTGGGTTTCTA              |
| <i>SRPK1</i>                              | ATGGAGCGGAAAGTGCTTG          | GAGCCTCGGTGCTGAGTTT               |
| <i>SRI</i> Constitutive Exon 4 to Exon 6  | GGCATTGCTGGAGGATACAAAC       | CCCATTGTGCCAGACATATCTC            |
| <i>SRI</i> Exon 1 to Exon 3               | CCAGCTTCTACCTATAAGACTTCAACTC | GTCCAGCTACAGCAGCAAAG              |
| <i>SRI</i> Exon 2 to Exon 3               | ATGGCGTACCCGGGGCATC          | GTCCAGCTACAGCAGCAAAG              |
| <i>CD46</i> Constitutive Exon 2           | ACCAACATTTGAAGCTATGGAGC      | GCCATGTATGATTCCGATCACAA           |
| <i>CD46</i> Exon 8 to Exon 10             | CGACTTCTTCCACTACAAAATCTCC    | CTGTCAAGTATTCCTTCCTCAGG           |
| <i>RECQL5</i> Constitutive Exon 7         | GTTTGTGCGCCCATTGGAATATTGCC   | CTTCCTTCCTGATCAGGAAGCTGAC         |
| <i>RECQL5</i> $\alpha$ Exon 7 to Exon 8.2 | GTCAGCTTCCTGATCAGGAAGGAAG    | CTTTGCTCCACATATAAAAATAAGTCACTTACC |
| <i>RECQL5</i> $\gamma$ Exon 7 to Exon 8.3 | GTCAGCTTCCTGATCAGGAAGGAAG    | CTGACTACACCAAGCAGCCCTCAGACTC      |
| <i>RECQL5</i> $\beta$ Exon 9 to Exon 9    | CGCTGCCTGCCTGCGCCAAAG        | GCTGAAGTCCCCGTAGCCCTTGCG          |

**Supplementary Figure S2:** Table of primers used for *in vitro* validation of Wnt regulated gene and isoform expression.

**SUPPLEMENTARY FIGURE S3**

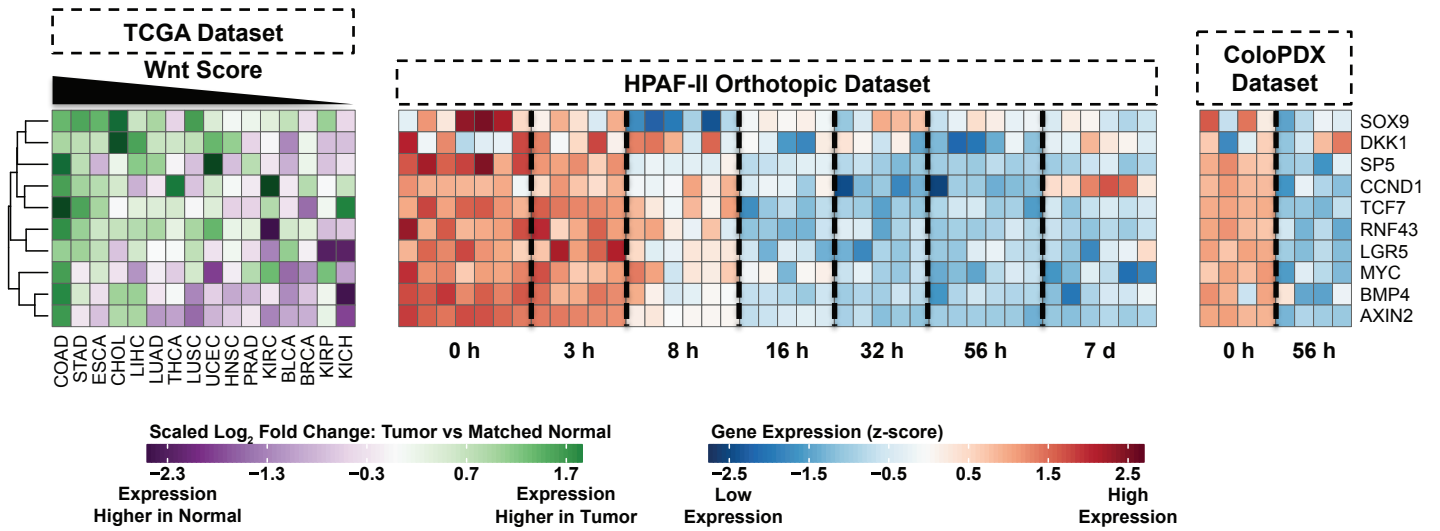

**Supplementary Figure S3:** Wnt score was calculated to sort the tumor types extracted from The Cancer Genome Atlas (TCGA), as seen in main Figure 4. Tumors with high a Wnt score indicate strong influence of Wnt/ $\beta$ -catenin signaling. The Wnt score was calculated based on the gene expression of 10 well-established Wnt target genes (shown in the heatmap). The rightmost and center heatmaps show the expression of these Wnt target genes in the colorectal PDX (ColoPDX) dataset and the HPAF-II orthotopic dataset respectively. For these heatmaps, red indicates high expression while blue indicates low expression. The expression of these Wnt target genes decreases with ETC-159 treatment in both of the *in vivo* datasets. The leftmost heatmap shows the gene expression fold change (of the tumors relative to the matched normal samples) for the tumors shown in the TCGA dataset for the indicated Wnt target genes. A positive fold change (shown in green) indicates that the expression of the gene is higher in the tumors relative to the normals. A negative fold change (shown in purple) indicates that the expression of the gene is higher in the normal samples relative to the tumors.

**SUPPLEMENTARY FIGURE S4**

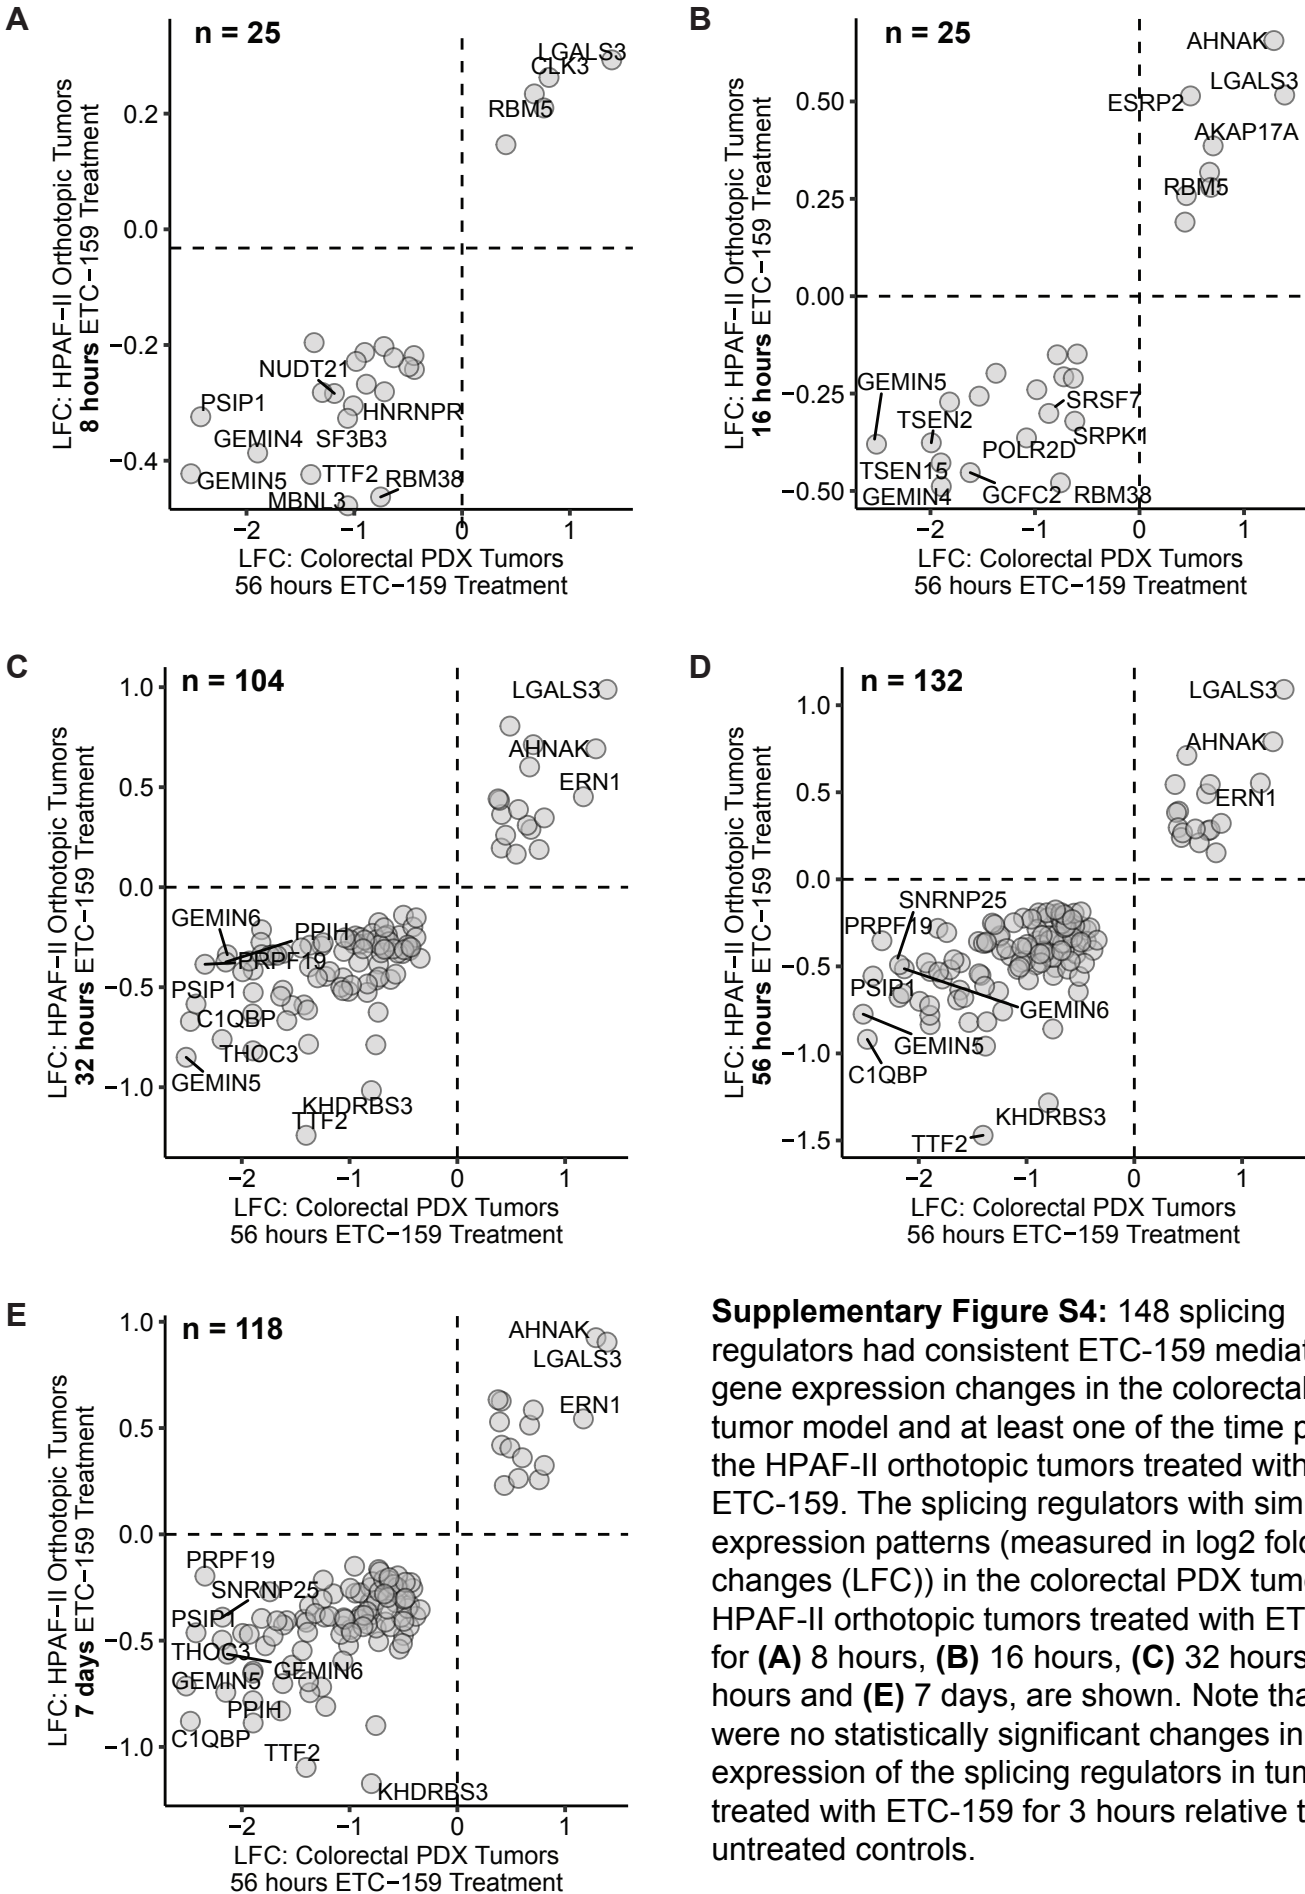

**Supplementary Figure S4:** 148 splicing regulators had consistent ETC-159 mediated gene expression changes in the colorectal PDX tumor model and at least one of the time points in the HPAF-II orthotopic tumors treated with ETC-159. The splicing regulators with similar expression patterns (measured in log2 fold changes (LFC)) in the colorectal PDX tumors and HPAF-II orthotopic tumors treated with ETC-159 for **(A)** 8 hours, **(B)** 16 hours, **(C)** 32 hours, **(D)** 56 hours and **(E)** 7 days, are shown. Note that there were no statistically significant changes in the expression of the splicing regulators in tumors treated with ETC-159 for 3 hours relative to the untreated controls.

## SUPPLEMENTARY FIGURE S5

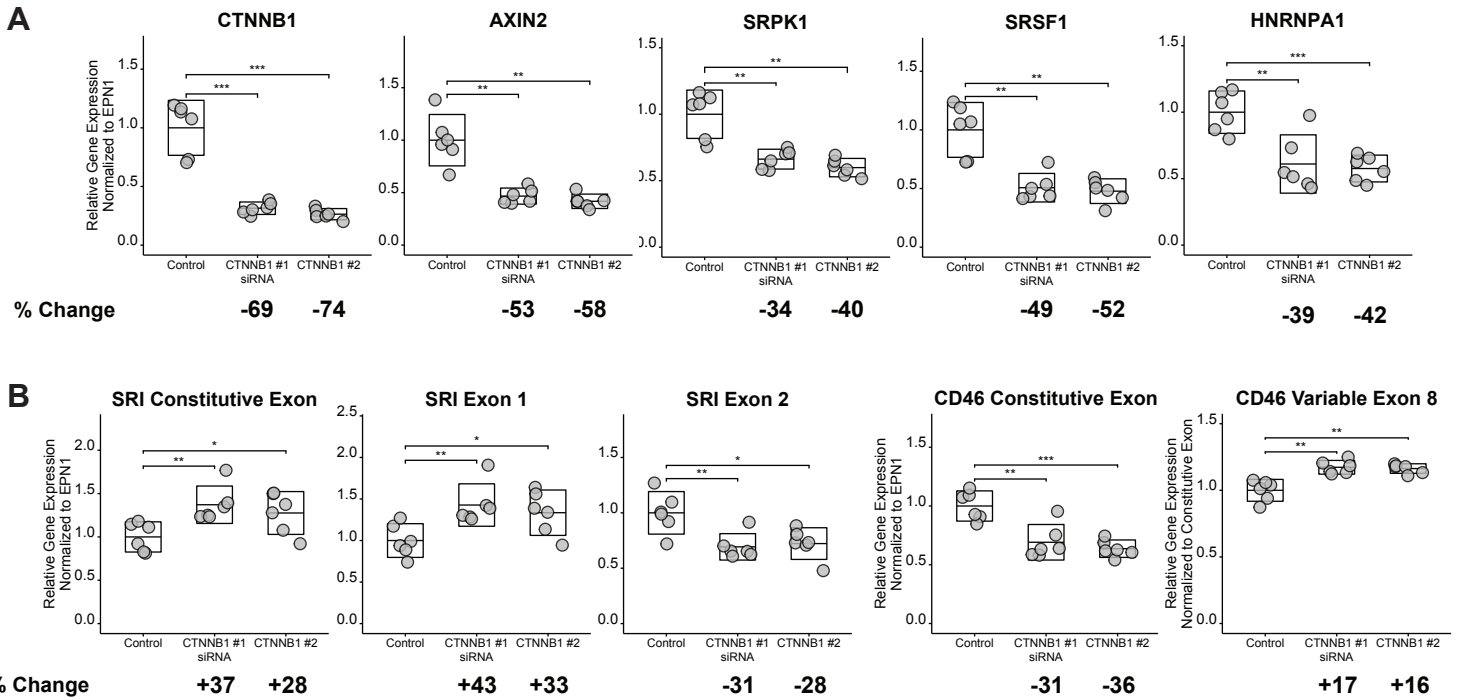

**Supplementary Figure S5:** Gene expression changes driven by the siRNA-mediated knockdown of  $\beta$ -catenin using 6 biological replicates. HPAF-II cells were transfected with 25 nM of non-targeting control (Dharmcon; D-001810-10) or two independent  $\beta$ -catenin (siRNA #1: GCGUUUGGCUGAACCAUCA; siRNA #2: GGUACGAGCUGCUAUGUUC) siRNAs using the Dharmacon Reagent according to the manufacturer's protocol. After 3 days, RNA was extracted from the cells using the RNeasy MiniKit (Qiagen) and quantitative PCR (qPCR) was performed using the primers listed in the table in Supplementary Figure S2. Both of the siRNAs for  $\beta$ -catenin were able to significantly suppress the gene expression of  $\beta$ -catenin and, consequently, the Wnt target genes, *AXIN2* and *NOTUM*. A two-tailed t-test was performed between the indicated samples.  $p > 0.05$ : ns;  $p \leq 0.05$ : \*;  $p \leq 0.01$ : \*\*;  $p \leq 0.001$ : \*\*\*;  $p \leq 0.0001$ : \*\*\*\*.

# SUPPLEMENTARY FIGURE S6

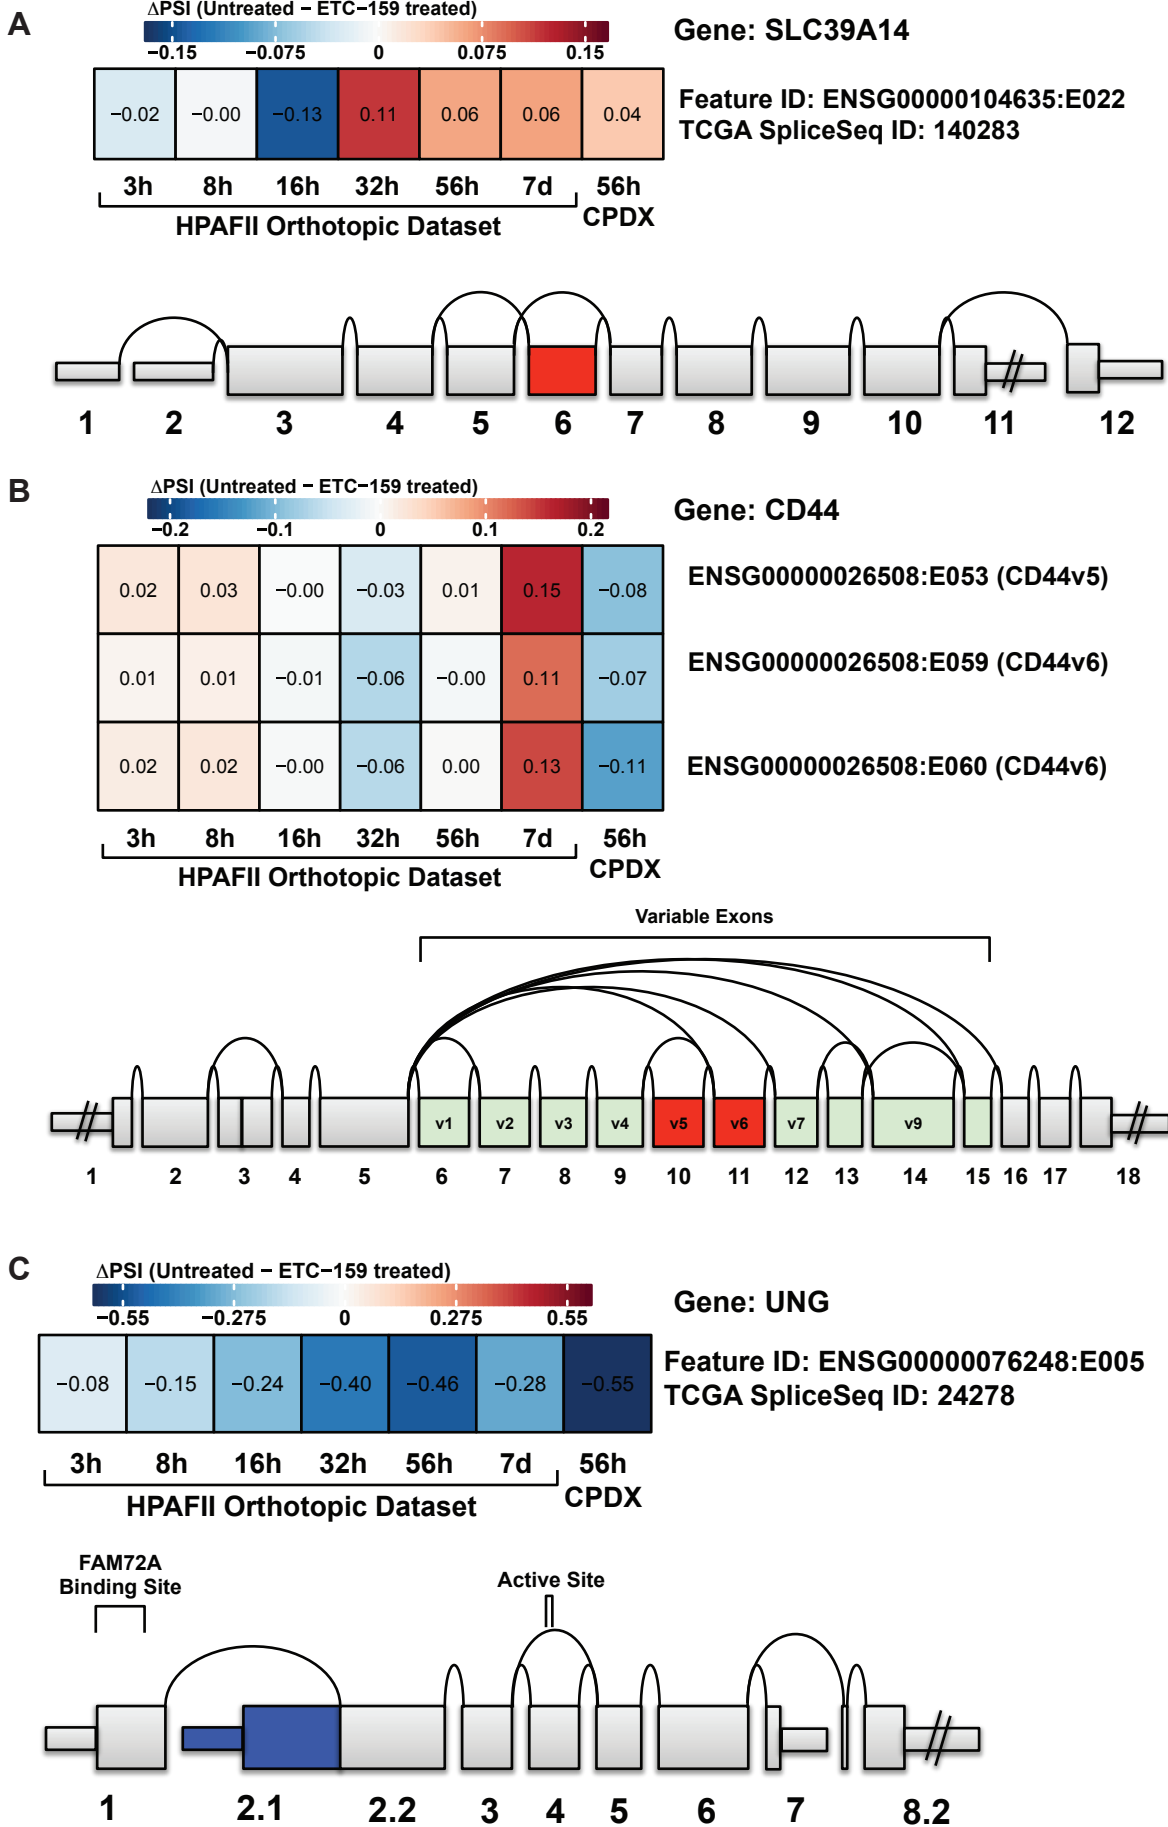

**Supplementary Figure S6:** Schematic illustrations of the gene structure and the effect of ETC-159 treatment on the variable exon expression induced in the two *in vivo* tumor models (shown in the heatmap). The heatmaps show the magnitude of the variable exon expression (measure in  $\Delta$ PSI). A positive  $\Delta$ PSI value (shown in red) suggests that Wnt signaling promotes the expression of the variable exon while a negative  $\Delta$ PSI value (shown in blue) suggests that Wnt signaling suppresses the expression of the variable exon. **(A)** Wnt signaling induces the expression of mutually exclusive exon 6 of *SLC39A14*. This splicing event and its association with Wnt signaling have been previously established. **(B)** Wnt signaling induces the expression of *CD44* isoforms that include variable exons 5 and 6. This splicing event and its association with Wnt signaling have been previously established. **(C)** Wnt signaling suppresses transcription of *UNG* originating at a promoter proximal to exon 2.1. The connection between Wnt signaling and this alternative promoter usage event in *UNG* was not previously established.

**SUPPLEMENTARY FIGURE S7**

| Gene    | Splice ID for our study | Time Point (ETC-159 Treatment) | Splice ID for Shinde et al.                   |
|---------|-------------------------|--------------------------------|-----------------------------------------------|
| DEDD2   | ENSG00000160570:E021    | 8 hours                        | ENSMUSG00000054499:25219764-25219859:target   |
| TSC22D1 | ENSG00000102804:E020    |                                | ENSMUSG00000022010:76438933-76439108:target   |
| CUEDC1  | ENSG00000180891:E010    | 32 hours                       | ENSMUSG00000018378:88188783-88188850:source   |
| E2F4    | ENSG00000205250:E015    |                                | ENSMUSG00000014859:105298072-105298182:source |
| TLCD1   | ENSG00000160606:E010    |                                | ENSMUSG00000019437:78179273-78179452:target   |
| TSC22D1 | ENSG00000102804:E020    |                                | ENSMUSG00000022010:76438933-76439108:target   |
| PRPF39  | ENSG00000185246:E016    | 56 hours                       | ENSMUSG00000035597:65044006-65044124:target   |
| RGS3    | ENSG00000138835:E051    |                                | ENSMUSG00000059810:62689499-62690626:target   |
| ABR     | ENSG00000159842:E086    | 7 days                         | ENSMUSG00000017631:76508888-76509419:source   |
| PARP9   | ENSG00000138496:E018    |                                | ENSMUSG00000022906:35943369-35943805:source   |
| RGS3    | ENSG00000138835:E051    |                                | ENSMUSG00000059810:62689499-62690626:target   |
| SNRNP70 | ENSG00000104852:E022    |                                | ENSMUSG00000063511:45381224-45381234:target   |
| ZDHHC4  | ENSG00000136247:E009    |                                | ENSMUSG00000001844:143328295-143328570:source |
| TACC2   | ENSG00000138162:E018    | Colorectal PDX                 | ENSMUSG00000030852:130674602-130674739:target |

**Supplementary Figure S7:** A tabulation of the isoform expression changes that were detected in our analysis from the two *in vivo* human tumor models and the analysis by Shinde and colleagues with a *GSK3* double-knockout model in mouse embryonic stem cells.



**SUPPLEMENTARY FIGURE S8**

| featureID            | GeneID          | Symbol   | $\Delta$ PSI (Untreated Samples - ETC-159 Treated Samples) |         |          |          |          |                        |          |
|----------------------|-----------------|----------|------------------------------------------------------------|---------|----------|----------|----------|------------------------|----------|
|                      |                 |          | HPAF-II Orthotopic Dataset                                 |         |          |          |          | Colorectal PDX Dataset |          |
|                      |                 |          | 3 hours                                                    | 8 hours | 16 hours | 32 hours | 56 hours | 7 days                 | 56 hours |
| ENSG00000078304:E021 | ENSG00000078304 | PPP2R5C  | 4                                                          | 7       | 6        | 15       | 16       | 8                      | 15       |
| ENSG00000091436:E021 | ENSG00000091436 | MAP3K20  | 14                                                         | 11      | 12       | 17       | 16       | 20                     | 28       |
| ENSG00000091436:E022 | ENSG00000091436 | MAP3K20  | 11                                                         | 6       | 8        | 9        | 13       | 16                     | 24       |
| ENSG00000092978:E011 | ENSG00000092978 | GPATCH2  | 3                                                          | 0       | 3        | 10       | 5        | 20                     | 29       |
| ENSG00000111652:E026 | ENSG00000111652 | COPS7A   | 4                                                          | 1       | 0        | 8        | 13       | 6                      | 18       |
| ENSG00000118564:E035 | ENSG00000118564 | FBXL5    | 0                                                          | 0       | -1       | 10       | 4        | -10                    | 11       |
| ENSG00000138434:E009 | ENSG00000138434 | SSFA2    | 4                                                          | 0       | 5        | -2       | 9        | 11                     | 18       |
| ENSG00000138434:E010 | ENSG00000138434 | SSFA2    | 5                                                          | -1      | 6        | -2       | 12       | 11                     | 20       |
| ENSG00000138434:E013 | ENSG00000138434 | SSFA2    | 4                                                          | -5      | 6        | -10      | 9        | 11                     | 28       |
| ENSG00000144560:E026 | ENSG00000144560 | VGLL4    | 5                                                          | 10      | 6        | 16       | 21       | 20                     | 14       |
| ENSG00000152767:E070 | ENSG00000152767 | FARP1    | 0                                                          | 2       | 4        | 0        | 12       | 11                     | 15       |
| ENSG00000153944:E049 | ENSG00000153944 | MSI2     | 1                                                          | -3      | 4        | 1        | 14       | 11                     | 14       |
| ENSG00000154639:E013 | ENSG00000154639 | CXADR    | 7                                                          | 5       | -2       | 7        | 14       | 19                     | 16       |
| ENSG00000160218:E008 | ENSG00000160218 | TRAPPC10 | 1                                                          | -16     | 3        | -7       | 11       | 7                      | 20       |
| ENSG00000178177:E005 | ENSG00000178177 | LCORL    | -1                                                         | 10      | 8        | 11       | 9        | 12                     | 22       |
| ENSG00000079616:E033 | ENSG00000079616 | KIF22    | -2                                                         | -7      | -2       | -6       | -11      | -13                    | -22      |
| ENSG00000089177:E006 | ENSG00000089177 | KIF16B   | -1                                                         | 2       | 8        | -19      | 8        | 9                      | -18      |
| ENSG00000094914:E043 | ENSG00000094914 | AAAS     | 1                                                          | -10     | 5        | -22      | -18      | -14                    | -24      |
| ENSG00000100105:E009 | ENSG00000100105 | PATZ1    | -4                                                         | -12     | -6       | -20      | -13      | -10                    | -20      |
| ENSG00000101158:E039 | ENSG00000101158 | NELFCD   | 6                                                          | -10     | 5        | -5       | 4        | 5                      | -17      |
| ENSG00000104129:E005 | ENSG00000104129 | DNAJC17  | -2                                                         | 1       | -7       | 5        | -10      | 8                      | -11      |
| ENSG00000108469:E040 | ENSG00000108469 | RECQL5   | 0                                                          | -4      | 3        | -15      | -14      | -12                    | -35      |
| ENSG00000112081:E011 | ENSG00000112081 | SRSF3    | -1                                                         | 4       | -4       | 8        | -10      | 8                      | -21      |
| ENSG00000112081:E012 | ENSG00000112081 | SRSF3    | 2                                                          | -4      | -4       | -11      | -13      | -10                    | -27      |
| ENSG00000131389:E016 | ENSG00000131389 | SLC6A6   | -2                                                         | -14     | -5       | -18      | 0        | 2                      | -12      |
| ENSG00000133703:E004 | ENSG00000133703 | KRAS     | 1                                                          | -2      | 3        | -8       | -12      | -14                    | -18      |
| ENSG00000138600:E010 | ENSG00000138600 | SPPL2A   | -4                                                         | 1       | 6        | 5        | -6       | -10                    | -15      |
| ENSG00000156787:E025 | ENSG00000156787 | TBC1D31  | 6                                                          | -15     | 6        | 17       | 4        | -24                    | -53      |
| ENSG00000166508:E033 | ENSG00000166508 | MCM7     | -1                                                         | 2       | -3       | -19      | -14      | -12                    | -29      |
| ENSG00000166508:E034 | ENSG00000166508 | MCM7     | -2                                                         | -4      | -6       | -34      | -35      | -22                    | -46      |
| ENSG00000166851:E009 | ENSG00000166851 | PLK1     | -1                                                         | 3       | -2       | 5        | -15      | 7                      | -58      |
| ENSG00000168056:E053 | ENSG00000168056 | LTBP3    | 7                                                          | -14     | -14      | -24      | -15      | 12                     | -17      |
| ENSG00000172167:E019 | ENSG00000172167 | MTBP     | 5                                                          | 3       | -5       | -13      | 9        | 8                      | -83      |
| ENSG00000177463:E020 | ENSG00000177463 | NR2C2    | 1                                                          | -2      | -4       | -11      | 2        | 4                      | -16      |
| ENSG00000187147:E032 | ENSG00000187147 | RNF220   | 1                                                          | 3       | 3        | -14      | 11       | 5                      | -10      |

**Supplementary Figure S8:** A tabulation of the 35 isoform expression changes from 30 genes that were shared between the pancreatic and colorectal cancers from the RNA-seq datasets. This list was generated with the filters shown in main Figure 3A ( $|\Delta$ PSI|  $\geq$  10% & adjusted p-value  $\leq$  0.1). The magnitude of the differential variable exon usage (measured in  $\Delta$ PSI) is shown in the table. The data that did not pass the aforementioned filters have been shaded out. More detailed information about these Wnt regulated isoform expression changes can be found in Supplementary Table 2.

# SUPPLEMENTARY FIGURE S9

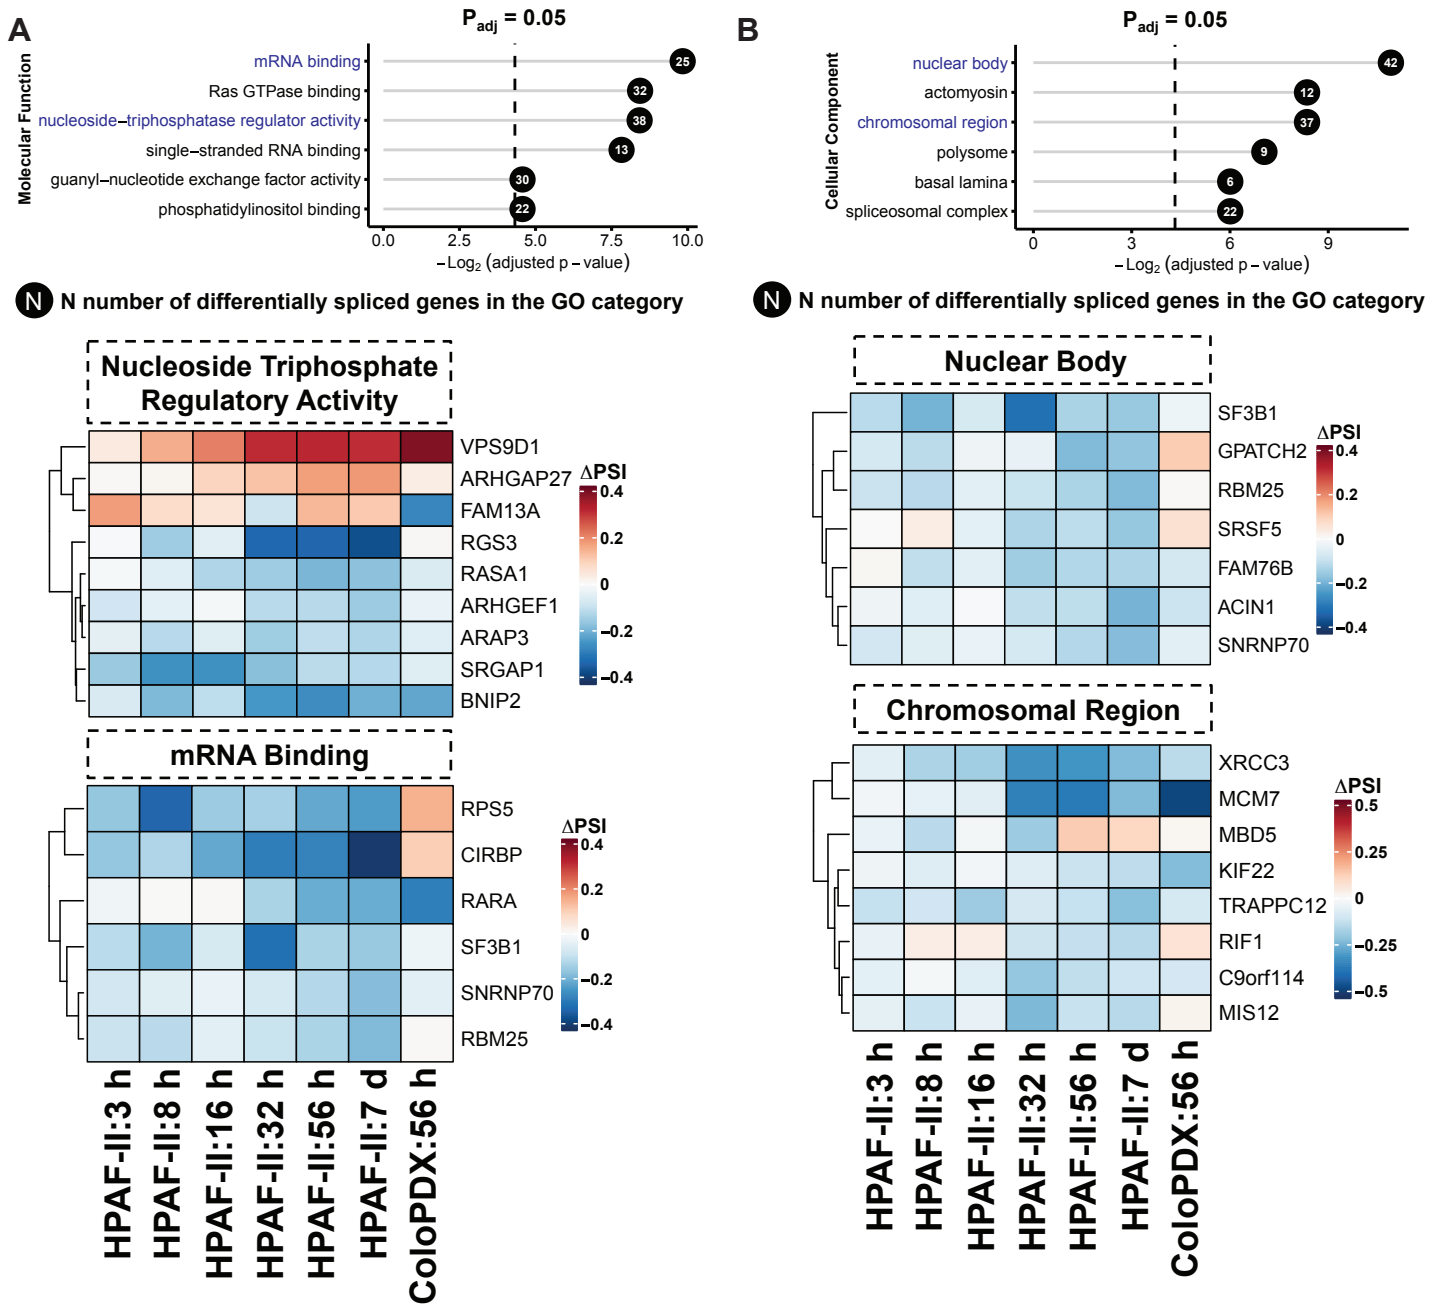

**Supplementary Figure S9:** Genes involved in Wnt regulated variable exon usage have important biological functions. Gene Ontology (GO) analysis of the genes that were found to be differentially spliced in at least one time point in either the HPAF-II orthotopic or colorectal PDX (ColoPDX) tumor models. Genes associated with two of the categories in the GO analysis are shown in the heatmaps below together with the magnitude of splicing change ( $\Delta\text{PSI}$ ) or the ETC-159 treated time points relative to the untreated controls. **(A)** Molecular function GO. **(B)** Cellular component GO. Hierarchical clustering was applied to each heatmap.

**SUPPLEMENTARY FIGURE S10**

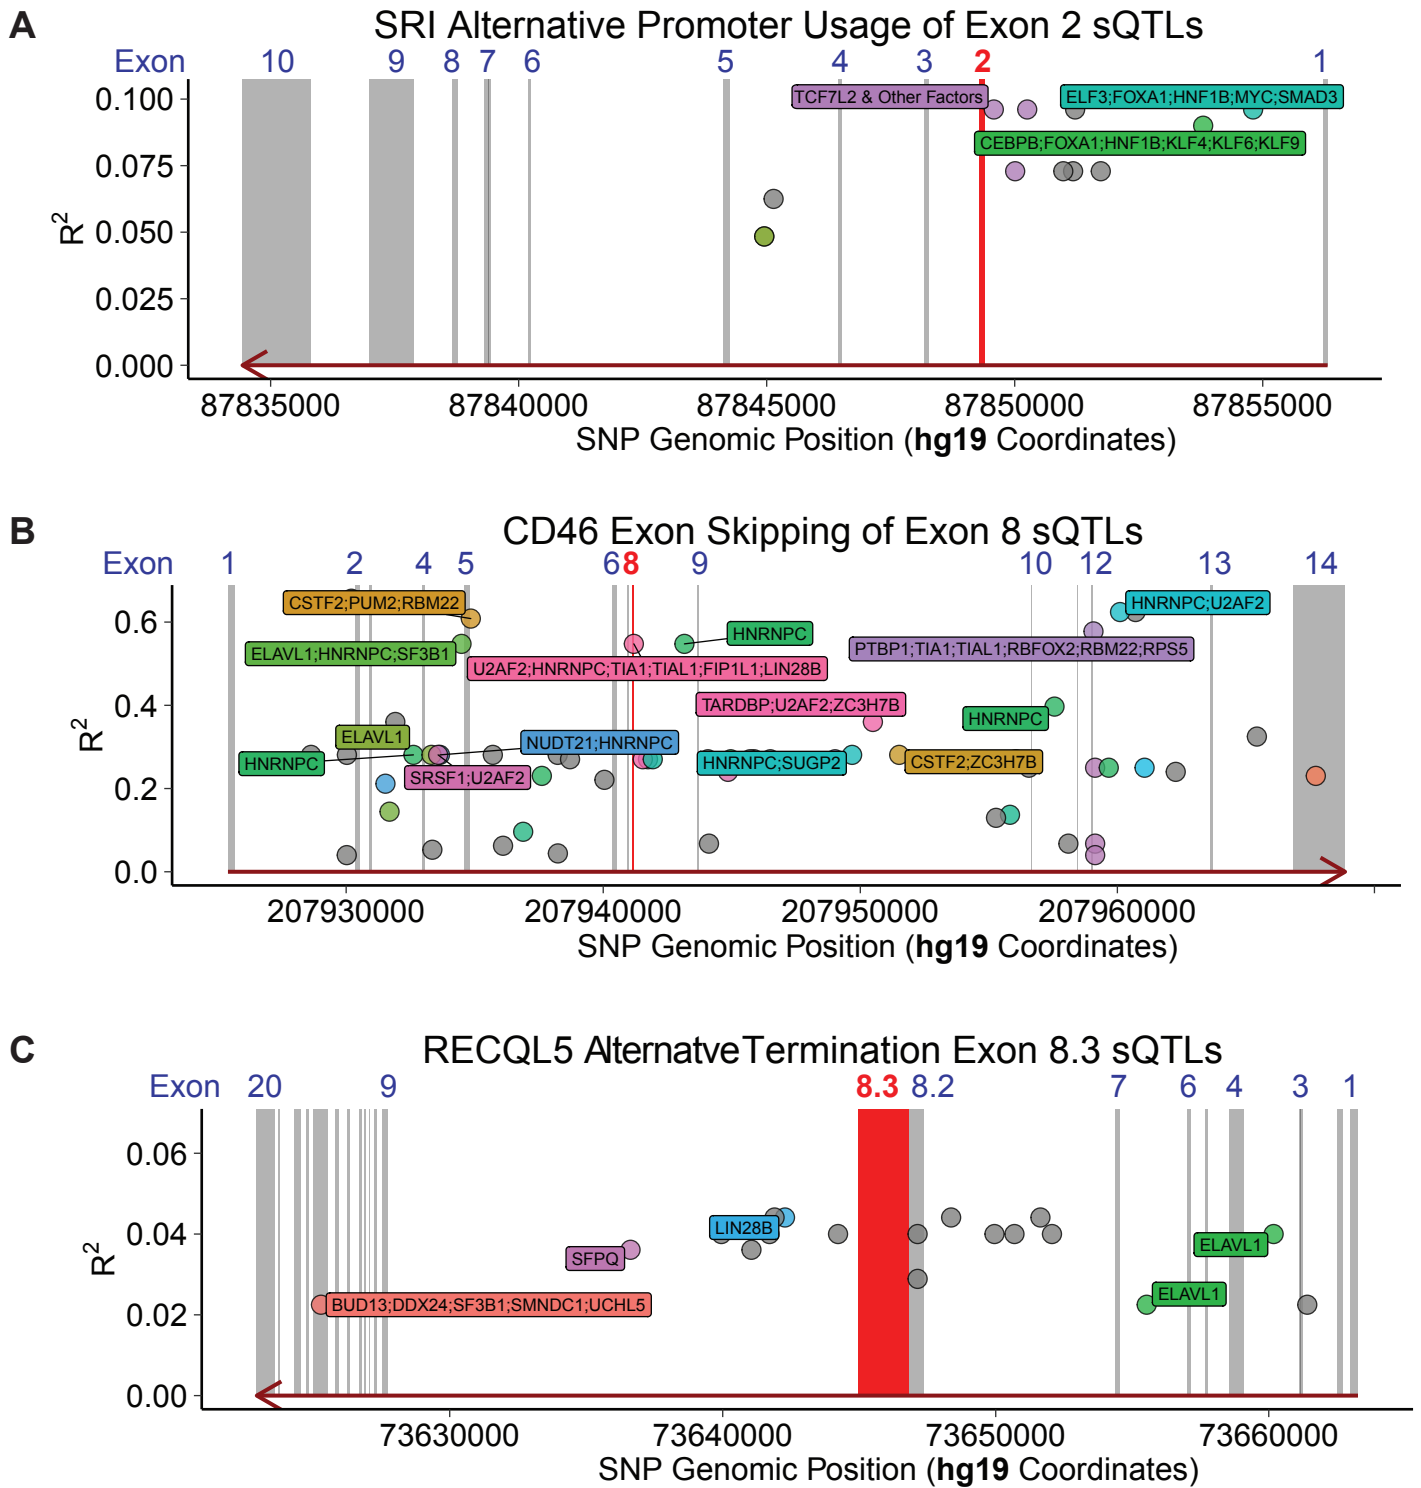

**Supplementary Figure S10:** Genomic maps of the splicing Quantitative Trait Loci (sQTLs) and their associated exons for **(A)** the alternative promoter usage of *SRI* exon 2, **(B)** exon skipping of *CD46* exon 8 and **(C)** alternative termination of *RECQL5* exon 8.3. Genomic coordinates show the relative position of all the exons in the gene (highlighted in grey with the variable exon highlighted in red) and the sQTLs. The R<sup>2</sup> values indicate the magnitude of the splicing (in terms of PSI values) that can be explained by the sQTL. The larger the R<sup>2</sup> value, the stronger the association between the sQTL and the variable exon expression. sQTLs that overlap with known transcriptional regulator (in the case of *SRI* exon 2 **(A)**) and RNA-binding protein (for *CD46* exon 8 **(B)** and *RECQL5* exon 8.3 **(C)**) binding sites have been labelled.
